# Supplementary material for: Clinical utility of tumour mutational burden on efficacy of immune checkpoint inhibitors in malignant solid tumours: protocol for a systematic review and meta-analysis
Source: PubMed Central journal article supplement (PMC9358952; doi:10.1136/bmjopen-2021-058692), 2022-08-04
Supplement: bmjopen-2021-058692supp001.pdf [file bmjopen-2021-058692supp001.pdf]

## Search strategies and results of 5 databases

Database: PubMed, OVID, Embase, the Cochrane Central Register of Controlled Trials Library databases, Web of Science.

Data Run: 01/07/2022

| database | Search strategies                                                                                                                                                                                                                                                                                                                                                                                                                                                                                                                                                                                                                                                                                                                                                                                                                                                                                                                                 | results |
|----------|---------------------------------------------------------------------------------------------------------------------------------------------------------------------------------------------------------------------------------------------------------------------------------------------------------------------------------------------------------------------------------------------------------------------------------------------------------------------------------------------------------------------------------------------------------------------------------------------------------------------------------------------------------------------------------------------------------------------------------------------------------------------------------------------------------------------------------------------------------------------------------------------------------------------------------------------------|---------|
| PubMed   | #1 "Immune Checkpoint Inhibitors" [Mesh Terms]                                                                                                                                                                                                                                                                                                                                                                                                                                                                                                                                                                                                                                                                                                                                                                                                                                                                                                    | 6109    |
|          | #2 "immunotherap*" [Title/Abstract] OR "immune checkpoint inhibit*" [Title/Abstract] OR "ICI" [Title/Abstract] OR "ICIs" [Title/Abstract] OR "immune checkpoint block*" [Title/Abstract] OR "ICB" [Title/Abstract] OR "ICBs" [Title/Abstract] OR "pembrolizumab" [Title/Abstract] OR "avelumab" [Title/Abstract] OR "nivolumab" [Title/Abstract] OR "durvalumab" [Title/Abstract] OR "tremelimumab" [Title/Abstract] OR "atezolizumab" [Title/Abstract] OR "Ipilimumab" [Title/Abstract] OR "Cemiplimab" [Title/Abstract] OR "tiragolumab" [Title/Abstract] OR "Dostarlimab*" [Title/Abstract] OR "Camrelizumab" [Title/Abstract] OR "PD-1" [Title/Abstract] OR "programmed death 1" [Title/Abstract] OR "PD-L1" [Title/Abstract] OR "programmed death-ligand 1" [Title/Abstract] OR "PD-1/PD-L1" [Title/Abstract] OR "anti-PD-1/anti-PD-L1" [Title/Abstract] OR "CTLA-4" [Title/Abstract] OR "Cytotoxic T-lymphocyte antigen 4" [Title/Abstract] | 164405  |
|          | #3 #1 OR #2                                                                                                                                                                                                                                                                                                                                                                                                                                                                                                                                                                                                                                                                                                                                                                                                                                                                                                                                       | 164676  |
|          | #4 "Carcinoma" [Title/Abstract] OR "Neoplasms" [Title/Abstract] OR "Cancer" [Title/Abstract] OR "Tumour" [Title/Abstract] OR "Tumor" [Title/Abstract]                                                                                                                                                                                                                                                                                                                                                                                                                                                                                                                                                                                                                                                                                                                                                                                             | 3285875 |
|          | #5 #3 and #4                                                                                                                                                                                                                                                                                                                                                                                                                                                                                                                                                                                                                                                                                                                                                                                                                                                                                                                                      | 102540  |
|          | #6 "mutation burden" [Title/Abstract] OR "mutational burden" [Title/Abstract] OR "mutation load" [Title/Abstract] OR "mutational load" [Title/Abstract] OR "TMB" [Title/Abstract] OR "TML" [Title/Abstract]                                                                                                                                                                                                                                                                                                                                                                                                                                                                                                                                                                                                                                                                                                                                       | 10061   |
|          | #7 #5 and #6                                                                                                                                                                                                                                                                                                                                                                                                                                                                                                                                                                                                                                                                                                                                                                                                                                                                                                                                      | 3268    |
| OVID     | #1 exp Immune Checkpoint Inhibitors/                                                                                                                                                                                                                                                                                                                                                                                                                                                                                                                                                                                                                                                                                                                                                                                                                                                                                                              | 14572   |
|          | #2 ((immunotherap*) or (immune checkpoint inhibit*) or (ICI) or (immune checkpoint inhibit*) or (ICIs) or (immune checkpoint block*) or (ICB) or (ICBs) or (pembrolizumab) or (avelumab) or (nivolumab) or (durvalumab) or (tremelimumab) or (atezolizumab) or (Ipilimumab) or (Cemiplimab) or (tiragolumab) or (Dostarlimab) or (Camrelizumab) or (PD-1) or (programmed death 1) or (PD-L1) or (programmed death-ligand 1) or (anti-PD-1) or (anti-PD-L1) or (CTLA-4) or (Cytotoxic T-lymphocyte antigen 4)).tw.                                                                                                                                                                                                                                                                                                                                                                                                                                 | 153834  |
|          | #3 #1 OR #2                                                                                                                                                                                                                                                                                                                                                                                                                                                                                                                                                                                                                                                                                                                                                                                                                                                                                                                                       | 156787  |
|          | #4 ((Carcinoma) or (Neoplasms) or (Cancer) or (Tumour) or (Tumor)).tw.                                                                                                                                                                                                                                                                                                                                                                                                                                                                                                                                                                                                                                                                                                                                                                                                                                                                            | 3136257 |
|          | #5 #3 and #4                                                                                                                                                                                                                                                                                                                                                                                                                                                                                                                                                                                                                                                                                                                                                                                                                                                                                                                                      | 94825   |
|          | #6 ((mutation burden) or (mutational burden) or (mutation load) or (mutational load) or (TMB) or (TML)).tw.                                                                                                                                                                                                                                                                                                                                                                                                                                                                                                                                                                                                                                                                                                                                                                                                                                       | 9467    |
|          | #7 #5 and #6                                                                                                                                                                                                                                                                                                                                                                                                                                                                                                                                                                                                                                                                                                                                                                                                                                                                                                                                      | 2963    |
| Embase   | #1 'immunotherap*':ab,ti OR 'immune checkpoint inhibit*':ab,ti OR 'ici':ab,ti OR 'icis':ab,ti OR 'immune checkpoint block*':ab,ti OR 'icb':ab,ti OR 'icbs':ab,ti OR 'pembrolizumab':ab,ti OR 'avelumab':ab,ti OR 'nivolumab':ab,ti OR 'durvalumab':ab,ti OR 'tremelimumab':ab,ti OR 'atezolizumab':ab,ti OR 'ipilimumab':ab,ti OR 'cemiplimab':ab,ti OR 'tiragolumab':ab,ti OR 'dostarlimab*':ab,ti OR 'camrelizumab':ab,ti OR 'pd-1':ab,ti OR 'programmed death 1':ab,ti OR 'pd-l1':ab,ti OR 'programmed death-ligand 1':ab,ti OR 'pd-1/pd-l1':ab,ti OR 'anti-pd-1/anti-pd-l1':ab,ti OR 'ctla-4':ab,ti OR 'cytotoxic t-lymphocyte antigen 4':ab,ti                                                                                                                                                                                                                                                                                               | 251032  |
|          | #2 'Carcinoma':ab,ti OR 'Neoplasms':ab,ti OR 'Cancer':ab,ti OR 'Tumour' ab,ti OR 'Tumor':ab,ti                                                                                                                                                                                                                                                                                                                                                                                                                                                                                                                                                                                                                                                                                                                                                                                                                                                    | 1809315 |
|          | #3 #1 and #2                                                                                                                                                                                                                                                                                                                                                                                                                                                                                                                                                                                                                                                                                                                                                                                                                                                                                                                                      | 101253  |
|          | #4 'mutation burden':ab,ti OR 'mutational burden':ab,ti OR 'mutation load':ab,ti OR 'mutational load':ab,ti OR 'TMB':ab,ti OR 'TML':ab,ti                                                                                                                                                                                                                                                                                                                                                                                                                                                                                                                                                                                                                                                                                                                                                                                                         | 16290   |
|          | #5 #3 and #4                                                                                                                                                                                                                                                                                                                                                                                                                                                                                                                                                                                                                                                                                                                                                                                                                                                                                                                                      | 5654    |
| Cochrane | #1 ("immunotherap*" OR immune checkpoint inhibit* OR ICI OR ICIs OR immune checkpoint block* OR ICB OR ICBS OR pembrolizumab OR avelumab OR nivolumab OR durvalumab OR tremelimumab OR atezolizumab OR Ipilimumab OR Cemiplimab OR tiragolumab OR Dostarlimab* OR Camrelizumab                                                                                                                                                                                                                                                                                                                                                                                                                                                                                                                                                                                                                                                                    | 21080   |

|                |                                                                                                                                                                                                                                                                                                                                                                                                                                                                                                                                                                                                                                                                                                                                                                                                                                                                                                                                                                                                                                                                                                                                                                                                                                                                                                                                                                                                                         |                                              |
|----------------|-------------------------------------------------------------------------------------------------------------------------------------------------------------------------------------------------------------------------------------------------------------------------------------------------------------------------------------------------------------------------------------------------------------------------------------------------------------------------------------------------------------------------------------------------------------------------------------------------------------------------------------------------------------------------------------------------------------------------------------------------------------------------------------------------------------------------------------------------------------------------------------------------------------------------------------------------------------------------------------------------------------------------------------------------------------------------------------------------------------------------------------------------------------------------------------------------------------------------------------------------------------------------------------------------------------------------------------------------------------------------------------------------------------------------|----------------------------------------------|
|                | OR PD-1 OR programmed death 1 OR PD-L1 OR programmed death-ligand 1 OR PD-1/PD-L1 OR anti-PD-1/anti-PD-L1 OR CTLA-4 OR Cytotoxic T-lymphocyte antigen 4):ti,ab,kw<br>#2 (Carcinoma OR Neoplasms OR Cancer OR Tumour OR Tumor):ti,ab,kw<br>#3 #1 and #2<br>#4 (mutation burden OR mutational burden OR mutation load OR mutational load OR TMB OR TML):ti,ab,kw<br>#5 #3 and #4                                                                                                                                                                                                                                                                                                                                                                                                                                                                                                                                                                                                                                                                                                                                                                                                                                                                                                                                                                                                                                          | 242648<br>13396<br>1495<br>460               |
| web of science | #1 (TI=("immunotherap*" OR "immune checkpoint inhibit*" OR "ICI" OR "ICIs" OR "immune checkpoint block*" OR "ICB" OR "ICBs" OR "pembrolizumab" OR "avelumab" OR "nivolumab" OR "durvalumab" OR "tremelimumab" OR "atezolizumab" OR "Ipilimumab" OR "Cemiplimab" OR "tiragolumab" OR "Dostarlimab*" OR "Camrelizumab" OR "PD-1" OR "programmed death 1" OR "PD-L1" OR "programmed death-ligand 1" OR "PD-1/PD-L1" OR "anti-PD-1/anti-PD-L1" OR "CTLA-4" OR "Cytotoxic T-lymphocyte antigen 4")) OR AB=("immunotherap*" OR "immune checkpoint inhibit*" OR "ICI" OR "ICIs" OR "immune checkpoint block*" OR "ICB" OR "ICBs" OR "pembrolizumab" OR "avelumab" OR "nivolumab" OR "durvalumab" OR "tremelimumab" OR "atezolizumab" OR "Ipilimumab" OR "Cemiplimab" OR "tiragolumab" OR "Dostarlimab*" OR "Camrelizumab" OR "PD-1" OR "programmed death 1" OR "PD-L1" OR "programmed death-ligand 1" OR "PD-1/PD-L1" OR "anti-PD-1/anti-PD-L1" OR "CTLA-4" OR "Cytotoxic T-lymphocyte antigen 4")<br>#2 (TS = ("Carcinoma" OR " Neoplasms" OR " Cancer" OR " Tumour" OR " Tumor")) OR AB = ("Carcinoma" OR " Neoplasms" OR " Cancer" OR " Tumour" OR " Tumor")<br>#3 #1 and #2<br>#4 (TS = ("mutation burden" OR "mutational burden" OR "mutation load" OR "mutational load" OR "TMB" OR "TML")) OR AB = ("mutation burden" OR "mutational burden" OR "mutation load" OR "mutational load" OR "TMB" OR "TML")<br>#5 #3 and #4 | 191683<br>4045332<br>111505<br>13058<br>3510 |
